# Supplementary material for: Community exposure and vulnerability to water quality and availability: a case study in the mining-affected Pazña Municipality, Lake Poopó Basin, Bolivian Altiplano
Source: PubMed Central journal article supplement (PMC5602086; doi:10.1007/s00267-017-0893-5), 2017-06-08

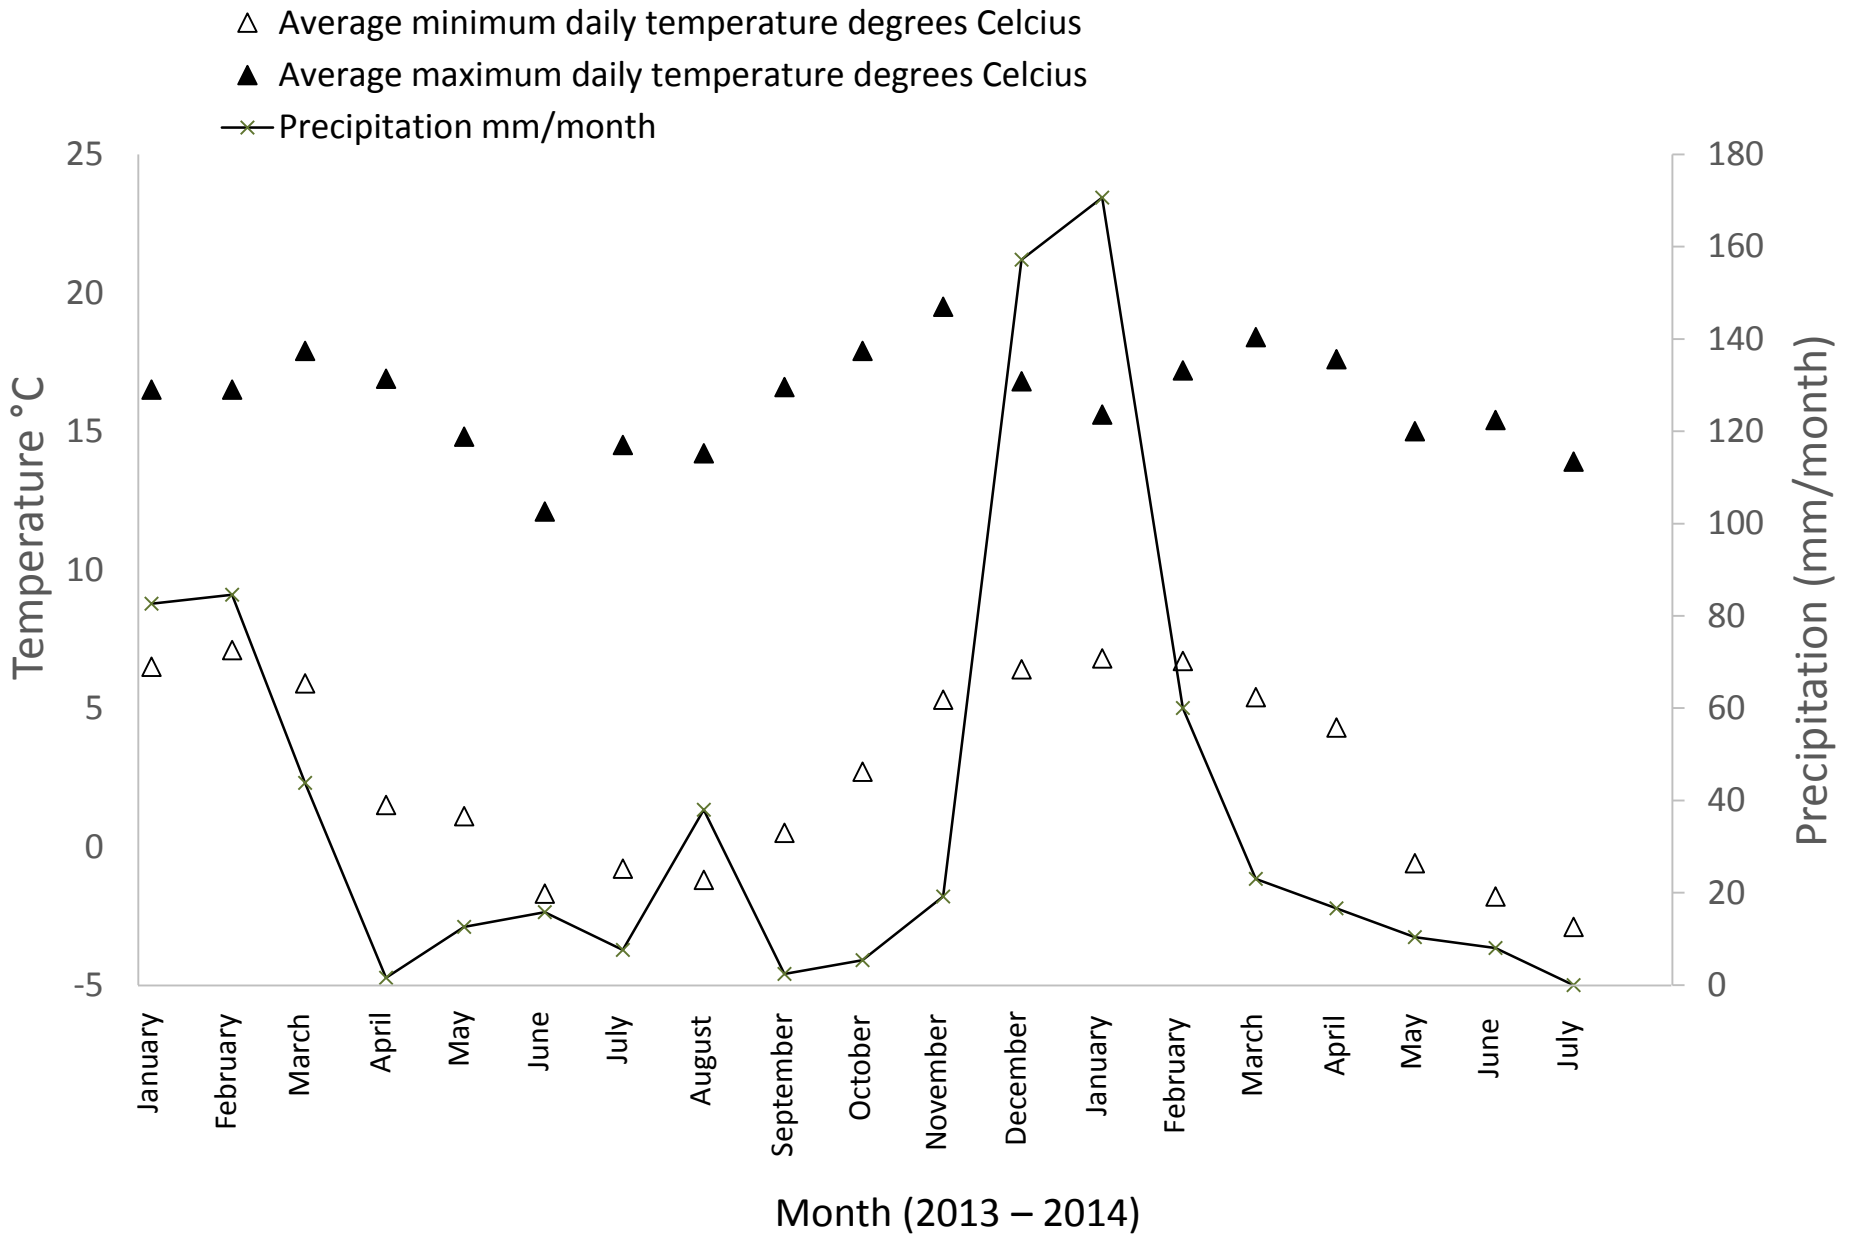

Supplement: 267_2017_893_MOESM1_ESM.pdf [file 267_2017_893_MOESM1_ESM.pdf]
